# Supplementary material
Source: MDPI journal article supplement (https://www.mdpi.com/2073-445X/12/1/215)
Supplement: s1 [file s1]

**Table S1.** List of plant species collected in forest rangelands of Northern Morocco with their life form, chorotype, and familial description.

| Plant Species                                              | Life Form        | Famille          | Palatability Index |
|------------------------------------------------------------|------------------|------------------|--------------------|
| <i>Achyranthes aspera</i> L. var <i>sicula</i> Roth        | Chamaephytes     | Amaranthaceae    | -                  |
| <i>Adenocarpus complicates</i> J. Gay ex Gren. & Godr.     | Phanerophytes    | Fabaceae         | 2                  |
| <i>Aegilops neglecta</i> Req. ex Bertol.                   | Therophytes      | Poaceae          | 1                  |
| <i>Agave americana</i> L.                                  | Chamaephytes     | Agavaceae        | -                  |
| <i>Agrimonia eupatoria</i> L.                              | Hemicryptophytes | Rosaceae         | 1                  |
| <i>Aira caryophyllea</i> L.                                | Therophytes      | Poaceae          | -                  |
| <i>Ajuga iva</i> (L.) Schreb.                              | Chamaephytes     | Lamiaceae        | -                  |
| <i>Allium triquetrum</i> L.                                | Geophytes        | Liliaceae        | -                  |
| <i>Amaranthus retroflexus</i> L.                           | Therophytes      | Chenopodiaceae   | -                  |
| <i>Ammi visnaga</i> (L.) Lam                               | Therophytes      | Apiaceae         | -                  |
| <i>Ampelodesmos mauritanicus</i> (Poir.) T.Durand & Schinz | Hemicryptophytes | Poaceae          | -                  |
| <i>Anacyclus pyrethrum</i> (L.) Link                       | Therophytes      | Asteraceae       | 2                  |
| <i>Anacyclus radiatus</i> Loisel                           | Therophytes      | Asteraceae       | 2                  |
| <i>Anagallis arvensis</i> L.                               | Hemicryptophytes | Primulaceae      | -                  |
| <i>Anarrhinum pedatum</i> Desf.                            | Hemicryptophytes | Plantaginaceae   | -                  |
| <i>Andryala integrifolia</i> L.                            | Hemicryptophytes | Asteraceae       | -                  |
| <i>Anogramma leptophylla</i> Link                          | Therophytes      | Pteridaceae      | -                  |
| <i>Anthoxanthum odoratum</i> L.                            | Hemicryptophytes | Poaceae          | -                  |
| <i>Anthyllis gerardii</i> L.                               | Hemicryptophytes | Fabaceae         | -                  |
| <i>Anthyllis hamosa</i> Desf.                              | Therophytes      | Fabaceae         | -                  |
| <i>Anthyllis vulneraria</i> L.                             | Hemicryptophytes | Fabaceae         | -                  |
| <i>Aphanes microcarpa</i> (Boiss. & Reut.) Rothm.          | Therophytes      | Rosaceae         | -                  |
| <i>Arbutus unedo</i> L.                                    | Phanerophytes    | Ericaceae        | 3                  |
| <i>Arisarum simorrhinum</i> Durieu                         | Geophytes        | Araceae          | 0                  |
| <i>Aristolochia baetica</i> L.                             | Phanerophytes    | Aristolochiaceae | -                  |
| <i>Aristolochia paucineris</i> Pomel                       | Geophytes        | Aristolochiaceae | -                  |
| <i>Arum italicum</i> Mill.                                 | Geophytes        | Araceae          | -                  |
| <i>Asparagus albus</i> L.                                  | Phanerophytes    | Liliaceae        | -                  |
| <i>Asparagus aphyllus</i> L.                               | Phanerophytes    | Asparagaceae     | -                  |
| <i>Asphodelus ramosus</i> L.                               | Geophytes        | Liliaceae        | 0                  |
| <i>Asplenium billotii</i> F.W.Schultz                      | Hemicryptophytes | Aspleniaceae     | -                  |
| <i>Asplenium ceterach</i> L.                               | Hemicryptophytes | Aspleniaceae     | -                  |
| <i>Asplenium onopteris</i> L.                              | Hemicryptophytes | Aspleniaceae     | -                  |
| <i>Asplenium trichomanes</i> L.                            | Hemicryptophytes | Aspleniaceae     | -                  |
| <i>Asteriscus aquaticus</i> (L.) Less.                     | Therophytes      | Asteraceae       | -                  |
| <i>Astragalus epiglottis</i> L.                            | Therophytes      | Fabaceae         | -                  |
| <i>Astragalus hamosus</i> L.                               | Therophytes      | Fabaceae         | -                  |
| <i>Astragalus scorpioides</i> Pourret                      | Therophytes      | Fabaceae         | -                  |
| <i>Avena alba</i> Vahl.                                    | Therophytes      | Poaceae          | 4                  |
| <i>Bellardia trixago</i> (L.) All.                         | Therophytes      | Orobanchaceae    | -                  |
| <i>Bellis annua</i> L.                                     | Therophytes      | Asteraceae       | 3                  |
| <i>Bellis sylvestris</i> Cyrillo                           | Hemicryptophytes | Asteraceae       | 3                  |
| <i>Biscutella didyma</i> L.                                | Therophytes      | Brassicaceae     | -                  |
| <i>Borago officinalis</i> L.                               | Therophytes      | Boraginaceae     | -                  |
| <i>Brachypodium distachyon</i> (L.) P.Beauv.               | Therophytes      | Poaceae          | 4                  |
| <i>Brachypodium gaditanum</i> Talavera                     | Therophytes      | Poaceae          | 4                  |
| <i>Briza maxima</i> L.                                     | Therophytes      | Poaceae          | -                  |

|                                                   |                         |                     |          |
|---------------------------------------------------|-------------------------|---------------------|----------|
| <i>Briza minor</i> L.                             | Therophytes             | Poaceae             | -        |
| <b><i>Bromus hordeaceus</i> L.</b>                | <b>Therophytes</b>      | <b>Poaceae</b>      | <b>3</b> |
| <b><i>Bromus mollis</i> L.</b>                    | <b>Therophytes</b>      | <b>Poaceae</b>      | <b>3</b> |
| <b><i>Bromus rubens</i> L.</b>                    | <b>Therophytes</b>      | <b>Poaceae</b>      | <b>3</b> |
| <b><i>Bromus tectorum</i> L.</b>                  | <b>Therophytes</b>      | <b>Poaceae</b>      | <b>3</b> |
| <i>Calendula aegyptiaca</i> Desf.                 | Therophytes             | Asteraceae          | -        |
| <i>Calendula arvensis</i> M.Bieb.                 | Therophytes             | Asteraceae          | -        |
| <b><i>Calicotome villosa</i> (Poir.) Link.</b>    | <b>Phanerophytes</b>    | <b>Fabaceae</b>     | <b>4</b> |
| <i>Campanula afra</i> Cav.                        | Therophytes             | Campanulaceae       | -        |
| <i>Campanula erinus</i> L.                        | Therophytes             | Campanulaceae       | -        |
| <i>Campanula lusitanica</i> Loefl.                | Therophytes             | Campanulaceae       | -        |
| <i>Campanula rapunculus</i> L.                    | Hemicryptophytes        | Campanulaceae       | -        |
| <b><i>Capsella bursa-pastoris</i> (L.) Medik.</b> | <b>Therophytes</b>      | <b>Brassicaceae</b> | <b>1</b> |
| <i>Carex distachya</i> Desf.                      | Hemicryptophytes        | Cyperaceae          | -        |
| <i>Carex divulsa</i> Stokes                       | Hemicryptophytes        | Cyperaceae          | -        |
| <i>Carlina hispanica</i> Lam.                     | Therophytes             | Asteraceae          | -        |
| <i>Carlina racemosa</i> L.                        | Therophytes             | Asteraceae          | -        |
| <i>Carthamus caeruleus</i> L.                     | Hemicryptophytes        | Asteraceae          | -        |
| <i>Centaurea pullata</i> L.                       | Hemicryptophytes        | Asteraceae          | -        |
| <i>Centaurea sphaerocephala</i> L.                | Hemicryptophytes        | Asteraceae          | -        |
| <i>Centaurium maritimum</i> (L.) Fritsch          | Therophytes             | Gentianaceae        | -        |
| <i>Centranthus calcitrapae</i> (L.) Dufr.         | Therophytes             | Caprifoliaceae      | -        |
| <i>Cephalanthera longifolia</i> (L.) Fritsch      | Geophytes               | Orchidaceae         | -        |
| <i>Cerastium glomeratum</i> Thuill.               | Therophytes             | Caryophyllaceae     | -        |
| <b><i>Ceratonia siliqua</i> L.</b>                | <b>Phanerophytes</b>    | <b>Fabaceae</b>     | <b>2</b> |
| <i>Chamaerops humilis</i> L.                      | Phanerophytes           | Arecaceae           | -        |
| <i>Chenopodium exsuccum</i> (Loscovs) Uotila      | Therophytes             | Amaranthaceae       | -        |
| <i>Chrysanthemum segetum</i> L.                   | Therophytes             | Asteraceae          | -        |
| <i>Cichorium intybus</i> L.                       | Hemicryptophytes        | Asteraceae          | -        |
| <i>Cirsium vulgare</i> (Savi) Ten.                | Hemicryptophytes        | Asteraceae          | -        |
| <b><i>Cistus albidus</i> L.</b>                   | <b>Chamaephytes</b>     | <b>Cistaceae</b>    | <b>5</b> |
| <b><i>Cistus creticus</i> L.</b>                  | <b>Chamaephytes</b>     | <b>Cistaceae</b>    | <b>5</b> |
| <b><i>Cistus crispus</i> L.</b>                   | <b>Chamaephytes</b>     | <b>Cistaceae</b>    | <b>5</b> |
| <b><i>Cistus ladanifer</i> L.</b>                 | <b>Chamaephytes</b>     | <b>Cistaceae</b>    | <b>4</b> |
| <b><i>Cistus monspeliensis</i> L.</b>             | <b>Chamaephytes</b>     | <b>Cistaceae</b>    | <b>5</b> |
| <b><i>Cistus populifolius</i> L.</b>              | <b>Chamaephytes</b>     | <b>Cistaceae</b>    | <b>5</b> |
| <b><i>Cistus salviifolius</i> L.</b>              | <b>Chamaephytes</b>     | <b>Cistaceae</b>    | <b>5</b> |
| <i>Clematis cirrhosa</i> L.                       | Phanerophytes           | Ranunculaceae       | -        |
| <i>Clematis flammula</i> L.                       | Phanerophytes           | Ranunculaceae       | -        |
| <b><i>Clinopodium nepeta</i> (L.) Kuntze</b>      | <b>Hemicryptophytes</b> | <b>Lamiaceae</b>    | <b>3</b> |
| <i>Convolvulus althaeoides</i> L.                 | Hemicryptophytes        | Convolvulaceae      | -        |
| <b><i>Coronopus didymus</i> (L.) Sm.</b>          | <b>Therophytes</b>      | <b>Brassicaceae</b> | <b>0</b> |
| <i>Crataegus monogyna</i> Jacq.                   | Phanerophytes           | Rosaceae            | -        |
| <i>Crepis vesicaria</i> L.                        | Hemicryptophytes        | Asteraceae          | -        |
| <i>Cydonia oblonga</i> Mill.                      | Phanerophytes           | Rosaceae            | -        |
| <i>Cynara humilis</i> L.                          | Hemicryptophytes        | Asteraceae          | -        |
| <b><i>Cynodon dactylon</i> (L.) Pers.</b>         | <b>Hemicryptophytes</b> | <b>Poaceae</b>      | <b>3</b> |
| <i>Cynoglossum cheirifolium</i> L.                | Therophytes             | Boraginaceae        | -        |
| <i>Cynoglossum creticum</i> Mill.                 | Therophytes             | Boraginaceae        | -        |
| <i>Cynosurus echinatus</i> L.                     | Therophytes             | Poaceae             | -        |
| <i>Cynosurus elegans</i> Desf.                    | Therophytes             | Poaceae             | -        |
| <i>Cytisus villosus</i> Pourr.                    | Phanerophytes           | Fabaceae            | -        |

|                                                         |                         |                      |          |
|---------------------------------------------------------|-------------------------|----------------------|----------|
| <b><i>Dactylis glomerata</i> L.</b>                     | <b>Hemicryptophytes</b> | <b>Poaceae</b>       | <b>3</b> |
| <b><i>Daphne gnidium</i> L.</b>                         | <b>Phanerophytes</b>    | <b>Thymelaeaceae</b> | <b>0</b> |
| <i>Daucus carota</i> subsp. <i>maximus</i> (Desf.) Ball | Hemicryptophytes        | Apiaceae             | -        |
| <i>Daucus setifolius</i> Desf.                          | Hemicryptophytes        | Apiaceae             | -        |
| <i>Davallia canariensis</i> (L.) Sm.                    | Hemicryptophytes        | Davalliaceae         | -        |
| <i>Delphinium peregrinum</i> L.                         | Therophytes             | Ranunculaceae        | -        |
| <i>Desmazeria rigida</i> (L.)                           | Therophytes             | Poaceae              | -        |
| <i>Dipcadi serotinum</i> (L.) Medik.                    | Geophytes               | Asparagaceae         | -        |
| <i>Diplotaxis catholica</i> (L.) DC.                    | Therophytes             | Brassicaceae         | -        |
| <i>Dittrichia viscosa</i> (L.) Greuter                  | Phanerophytes           | Asteraceae           | -        |
| <b><i>Drimia maritima</i> (L.) Stearn</b>               | <b>Geophytes</b>        | <b>Asparagaceae</b>  | <b>0</b> |
| <i>Echinops spinosus</i> L.                             | Chamaephytes            | Asteraceae           | -        |
| <i>Echium plantagineum</i> L.                           | Therophytes             | Boraginaceae         | -        |
| <i>Echium tuberculatum</i> Hoffm. & Link                | Therophytes             | Boraginaceae         | -        |
| <i>Elaeoselinum asclepium</i> (L.) Bertol.              | Hemicryptophytes        | Apiaceae             | -        |
| <b><i>Erica arborea</i> L.</b>                          | <b>Phanerophytes</b>    | <b>Ericaceae</b>     | <b>3</b> |
| <b><i>Erica umbellata</i> L.</b>                        | <b>Chamaephytes</b>     | <b>Ericaceae</b>     | <b>3</b> |
| <i>Erodium cicutarium</i> (L.) L'Hér.                   | Therophytes             | Geraniaceae          | -        |
| <i>Erodium moschatum</i> (L.) L'Hér.                    | Therophytes             | Geraniaceae          | -        |
| <i>Eryngium tricuspidatum</i> L.                        | Hemicryptophytes        | Apiaceae             | -        |
| <b><i>Euphorbia exigua</i> L.</b>                       | <b>Therophytes</b>      | <b>Euphorbiaceae</b> | <b>0</b> |
| <b><i>Euphorbia helioscopia</i> L.</b>                  | <b>Therophytes</b>      | <b>Euphorbiaceae</b> | <b>0</b> |
| <i>Evax pygmaea</i> (L.) Brot.                          | Therophytes             | Asteraceae           | -        |
| <i>Fedia cornucopiae</i> (L.) Gaertn.                   | Therophytes             | Caprifoliaceae       | -        |
| <i>Fedia graciliflora</i> Fisch. & C.A.Mey.             | Therophytes             | Caprifoliaceae       | -        |
| <i>Filago duriaei</i> Coss. ex Lange                    | Therophytes             | Asteraceae           | -        |
| <i>Filago germanica</i> L.                              | Therophytes             | Asteraceae           | -        |
| <i>Filago pyramidata</i> L.                             | Therophytes             | Asteraceae           | -        |
| <i>Foeniculum vulgare</i> Mill.                         | Hemicryptophytes        | Apiaceae             | -        |
| <i>Fraxinus angustifolia</i> Vahl.                      | Phanerophytes           | Oleaceae             | -        |
| <i>Fumaria agraria</i> Lag.                             | Therophytes             | Papaveraceae         | -        |
| <i>Galactites tomentosa</i> Moench                      | Hemicryptophytes        | Asteraceae           | -        |
| <i>Galium divaricatum</i> Pourr.                        | Therophytes             | Rubiaceae            | -        |
| <i>Galium murale</i> L.                                 | Therophytes             | Rubiaceae            | -        |
| <i>Galium scabrum</i> L.                                | Hemicryptophytes        | Rubiaceae            | -        |
| <i>Galium tricornutum</i> Dandy                         | Therophytes             | Rubiaceae            | -        |
| <i>Gaudinia fragilis</i> (L.) P.Beauv.                  | Therophytes             | Poaceae              | -        |
| <i>Genista linifolia</i> L.                             | Phanerophytes           | Fabaceae             | -        |
| <i>Genista spartioides</i> Spach                        | Phanerophytes           | Fabaceae             | -        |
| <b><i>Geranium dissectum</i> L.</b>                     | <b>Therophytes</b>      | <b>Geraniaceae</b>   | <b>3</b> |
| <b><i>Geranium lucidum</i> L.</b>                       | <b>Therophytes</b>      | <b>Geraniaceae</b>   | <b>3</b> |
| <b><i>Geranium molle</i> L.</b>                         | <b>Therophytes</b>      | <b>Geraniaceae</b>   | <b>3</b> |
| <i>Géranium purpureum</i> Vill.                         | Therophytes             | Geraniaceae          | -        |
| <i>Gladiolus illyricus</i> W.D.J.Koch                   | Geophytes               | Iridaceae            | -        |
| <i>Gladiolus italicus</i> Miller                        | Geophytes               | Iridaceae            | -        |
| <i>Gladiolus segetum</i> Ker Gawl.                      | Geophytes               | Iridaceae            | -        |
| <i>Gynandriris sisyrinchium</i> (L.) Parl.              | Geophytes               | Iridaceae            | -        |
| <i>Halimium umbellatum</i> (L.) Spach.                  | Chamaephytes            | Cistaceae            | -        |
| <i>Hedera helix</i> L.                                  | Phanerophytes           | Araliaceae           | -        |
| <i>Hedypnois rhagadioloides</i> (L.) F.W.Schmidt        | Therophytes             | Asteraceae           | -        |
| <i>Herniaria glabra</i> L.                              | Hemicryptophytes        | Caryophyllaceae      | -        |
| <i>Herniaria hirsuta</i> L.                             | Therophytes             | Caryophyllaceae      | -        |

|                                                   |                  |                 |   |
|---------------------------------------------------|------------------|-----------------|---|
| <i>Holcus lanatus</i> L.                          | Hemicryptophytes | Poaceae         | 4 |
| <i>Hordeum bulbosum</i> L.                        | Hemicryptophytes | Poaceae         | 4 |
| <i>Hordeum marinum</i> Huds.                      | Therophytes      | Poaceae         | 4 |
| <i>Hyoseris radiata</i> L.                        | Hemicryptophytes | Asteraceae      | - |
| <i>Hyparrhenia hirta</i> (L.) Stapf               | Hemicryptophytes | Poaceae         | - |
| <i>Hypericum Angustifolium</i> (DC.) A.Fröhl.     | Hemicryptophytes | Hypericaceae    | - |
| <i>Hypochaeris glabra</i> L.                      | Therophytes      | Asteraceae      | 2 |
| <i>Hypochaeris radicata</i> L.                    | Hemicryptophytes | Asteraceae      | 2 |
| <i>Illecebrum verticillatum</i> L.                | Therophytes      | Caryophyllaceae | - |
| <i>Koeleria splendens</i> C.Presl                 | Hemicryptophytes | Poaceae         | - |
| <i>Kundmannia sicula</i> (L.) DC.                 | Hemicryptophytes | Apiaceae        | - |
| <i>Lamarckia aurea</i> (L.) Moench                | Therophytes      | Poaceae         | 4 |
| <i>Lamium flexuosum</i> Ten.                      | Hemicryptophytes | Lamiaceae       | - |
| <i>Lathyrus annuus</i> L.                         | Therophytes      | Fabaceae        | - |
| <i>Lathyrus aphaca</i> L.                         | Therophytes      | Fabaceae        | - |
| <i>Lathyrus sphaericus</i> Retz.                  | Therophytes      | Fabaceae        | - |
| <i>Lavandula multifida</i> L.                     | Chamaephytes     | Lamiaceae       | 3 |
| <i>Lavandula stoechas</i> L.                      | Phanerophytes    | Lamiaceae       | 3 |
| <i>Legousia falcata</i> (Ten.) Fritsch            | Therophytes      | Campanulaceae   | - |
| <i>Leontodon hispidus</i> L.                      | Hemicryptophytes | Asteraceae      | - |
| <i>Leontodon saxatilis</i> Lam.                   | Hemicryptophytes | Asteraceae      | - |
| <i>Leontodon tuberosus</i> L.                     | Hemicryptophytes | Asteraceae      | - |
| <i>Leucojum trichophyllum</i> Schousb.            | Geophytes        | Amaryllidaceae  | - |
| <i>Linaria amethystea</i> (Lam.) Hoffmanns & Link | Therophytes      | Plantaginaceae  | - |
| <i>Linum bienne</i> Mill.                         | Therophytes      | Linaceae        | - |
| <i>Linum suffruticosum</i> L.                     | Chamaephytes     | Linaceae        | - |
| <i>Lobularia maritima</i> (L.) Desv.              | Chamaephytes     | Brassicaceae    | - |
| <i>Loeflingia baetica</i> Lag.                    | Therophytes      | Caryophyllaceae | - |
| <i>Logfia gallica</i> (L.) Coss. & Germ.          | Therophytes      | Asteraceae      | 1 |
| <i>Lolium multiflorum</i> Lam.                    | Therophytes      | Poaceae         | 4 |
| <i>Lolium rigidum</i> Gaudin                      | Therophytes      | Poaceae         | 4 |
| <i>Lonicera implexa</i> Aiton                     | Phanerophytes    | Caprifoliaceae  | - |
| <i>Lonicera periclymenum</i> L.                   | Phanerophytes    | Caprifoliaceae  | - |
| <i>Lotus conimbricensis</i> Brot.                 | Therophytes      | Fabaceae        | - |
| <i>Lotus parviflorus</i> Desf.                    | Therophytes      | Fabaceae        | - |
| <i>Luzula forsteri</i> (Sm.) DC.                  | Hemicryptophytes | Juncaceae       | - |
| <i>Lythrum junceum</i> Banks & Sol.               | Geophytes        | Lythraceae      | - |
| <i>Malva hispanica</i> L.                         | Therophytes      | Malvaceae       | 3 |
| <i>Malva parviflora</i> L.                        | Therophytes      | Malvaceae       | 3 |
| <i>Mandragora autumnalis</i> Bertol.              | Hemicryptophytes | Solanaceae      | - |
| <i>Marrubium vulgare</i> L.                       | Chamaephytes     | Lamiaceae       | - |
| <i>Medicago ciliaris</i> (L.) Krock               | Therophytes      | Fabaceae        | 5 |
| <i>Medicago minima</i> (L.) L.                    | Therophytes      | Fabaceae        | 5 |
| <i>Medicago orbicularis</i> (L.) Bartal.          | Therophytes      | Fabaceae        | 5 |
| <i>Medicago polymorpha</i> L.                     | Therophytes      | Fabaceae        | 5 |
| <i>Medicago sativa</i> L.                         | Hemicryptophytes | Fabaceae        | 5 |
| <i>Medicago truncatula</i> Gaertn.                | Therophytes      | Fabaceae        | 5 |
| <i>Melica uniflora</i> Retz.                      | Hemicryptophytes | Poaceae         | - |
| <i>Melilotus albus</i> Medik.                     | Hemicryptophytes | Fabaceae        | 3 |
| <i>Melilotus sulcatus</i> Desf.                   | Therophytes      | Fabaceae        | 3 |
| <i>Mentha pulegium</i> L.                         | Hemicryptophytes | Lamiaceae       | 3 |
| <i>Mentha suaveolens</i> Ehrh.                    | Hemicryptophytes | Lamiaceae       | 3 |

|                                               |                         |                         |          |
|-----------------------------------------------|-------------------------|-------------------------|----------|
| <i>Mercurialis ambigua</i> L.f.               | Therophytes             | Euphorbiaceae           | -        |
| <b>Misopates orontium</b> (L.) Raf            | <b>Therophytes</b>      | <b>Scrophulariaceae</b> | <b>1</b> |
| <i>Moehringia pentandra</i> J.Gay.            | Therophytes             | Caryophyllaceae         | -        |
| <i>Mucizonia hispida</i> Batt. & Trab.        | Therophytes             | Crassulaceae            | -        |
| <b>Myrtus communis</b> L.                     | <b>Phanerophytes</b>    | <b>Myrtaceae</b>        | <b>3</b> |
| <i>Oenanthe pimpinelloides</i> L.             | Geophytes               | Apiaceae                | -        |
| <b>Olea europaea var. sylvestris</b> L.       | <b>Phanerophytes</b>    | <b>Oleaceae</b>         | <b>3</b> |
| <i>Ononis natrix</i> L.                       | Chamaephytes            | Fabaceae                | -        |
| <b>Onopordum macracanthum</b> Schousb.        | <b>Hemicryptophytes</b> | <b>Asteraceae</b>       | <b>2</b> |
| <i>Ophrys atlantica</i> Munby                 | Geophytes               | Orchidaceae             | -        |
| <b>Origanum vulgare</b> L.                    | <b>Hemicryptophytes</b> | <b>Lamiaceae</b>        | <b>3</b> |
| <i>Ormenis praecox</i> (Link) Briq. & Cavill. | Therophytes             | Asteraceae              | -        |
| <i>Ornithogalum orthophyllum</i> Ten.         | Geophytes               | Asparagaceae            | -        |
| <i>Ornithogalum umbellatum</i> L.             | Geophytes               | Asparagaceae            | -        |
| <i>Ornithopus compressus</i> L.               | Therophytes             | Fabaceae                | -        |
| <i>Ornithopus isthmocarpus</i> Coss.          | Therophytes             | Fabaceae                | -        |
| <i>Ornithopus sativus</i> Brot.               | Therophytes             | Fabaceae                | -        |
| <i>Osyris quadripartita</i> Salzm.            | Phanerophytes           | Santalaceae             | -        |
| <i>Otospermum glabrum</i> (Lag.) Willk.       | Therophytes             | Asteraceae              | -        |
| <i>Oxalis corniculata</i> Linnaeus            | Hemicryptophytes        | Oxalidaceae             | -        |
| <i>Papaver rhoeas</i> L.                      | Therophytes             | Papaveraceae            | -        |
| <i>Parapholis filiformis</i> (Roth) C.E.Hubb. | Therophytes             | Poaceae                 | -        |
| <i>Parietaria lusitanica</i> L.               | Therophytes             | Urticaceae              | -        |
| <i>Paronychia argentea</i> Lam.               | Hemicryptophytes        | Caryophyllaceae         | -        |
| <i>Phagnalon saxatile</i> (L.) Cass.          | Chamaephytes            | Asteraceae              | -        |
| <b>Phillyrea angustifolia</b> L.              | <b>Phanerophytes</b>    | <b>Oleaceae</b>         | <b>5</b> |
| <b>Phillyrea latifolia</b> L.                 | <b>Phanerophytes</b>    | <b>Oleaceae</b>         | <b>5</b> |
| <b>Picris hispanica</b> (Willd.) P.D.Sell     | <b>Hemicryptophytes</b> | <b>Asteraceae</b>       | <b>2</b> |
| <i>Piptatherum miliaceum</i> (L.) Cosson      | Hemicryptophytes        | Poaceae                 | -        |
| <b>Pistacia lentiscus</b> L.                  | <b>Phanerophytes</b>    | <b>Anacardiaceae</b>    | <b>3</b> |
| <i>Pistorinia breviflora</i> Boiss.           | Therophytes             | Crassulaceae            | -        |
| <i>Plantago afra</i> L.                       | Therophytes             | Plantaginaceae          | -        |
| <i>Plantago coronopus</i> L.                  | Therophytes             | Plantaginaceae          | -        |
| <i>Plantago lagopus</i> L.                    | Therophytes             | Plantaginaceae          | -        |
| <i>Plantago serraria</i> L.                   | Hemicryptophytes        | Plantaginaceae          | -        |
| <i>Plumbago europaea</i> L.                   | Chamaephytes            | Plumbaginaceae          | -        |
| <b>Poa Annu</b> L.                            | <b>Therophytes</b>      | <b>Poaceae</b>          | <b>4</b> |
| <b>Poa bulbosa</b> L.                         | <b>Hemicryptophytes</b> | <b>Poaceae</b>          | <b>4</b> |
| <b>Poa trivialis</b> L.                       | <b>Hemicryptophytes</b> | <b>Poaceae</b>          | <b>4</b> |
| <i>Polycarpon tetraphyllum</i> (Linné) Linné  | Therophytes             | Caryophyllaceae         | -        |
| <i>Polygonum aviculare</i> L.                 | Therophytes             | Polygonaceae            | -        |
| <i>Polypodium cambricum</i> L.                | Hemicryptophytes        | Polypodiaceae           | -        |
| <i>Pteridium aquilinum</i> (L.) Kuhn          | Geophytes               | Dennstaedtiaceae        | -        |
| <i>Pulicaria odora</i> (L.) Rchb.             | Hemicryptophytes        | Asteraceae              | -        |
| <b>Quercus canariensis</b> Willd.             | <b>Phanerophytes</b>    | <b>Fagaceae</b>         | <b>4</b> |
| <b>Quercus coccifera</b> L.                   | <b>Phanerophytes</b>    | <b>Fagaceae</b>         | <b>4</b> |
| <b>Quercus faginea</b> Lam.                   | <b>Phanerophytes</b>    | <b>Fagaceae</b>         | <b>4</b> |
| <b>Quercus rotundifolia</b> Lam.              | <b>Phanerophytes</b>    | <b>Fagaceae</b>         | <b>4</b> |
| <b>Quercus suber</b> L.                       | <b>Phanerophytes</b>    | <b>Fagaceae</b>         | <b>5</b> |
| <i>Ranunculus bullatus</i> L.                 | Geophytes               | Ranunculaceae           | -        |
| <i>Ranunculus ficaria</i> L.                  | Hemicryptophytes        | Ranunculaceae           | -        |
| <i>Ranunculus macrophyllus</i> Desf.          | Geophytes               | Ranunculaceae           | -        |

|                                                   |                         |                     |          |
|---------------------------------------------------|-------------------------|---------------------|----------|
| <i>Ranunculus muricatus</i> L.                    | Therophytes             | Ranunculaceae       | -        |
| <i>Ranunculus paludosus</i> Poir.                 | Geophytes               | Ranunculaceae       | -        |
| <i>Ranunculus parviflorus</i> L.                  | Therophytes             | Ranunculaceae       | -        |
| <i>Raphanus raphanistrum</i> L.                   | Therophytes             | Brassicaceae        | -        |
| <i>Reichardia tingitana</i> (L.) Roth             | Therophytes             | Asteraceae          | -        |
| <b><i>Reseda alba</i> L.</b>                      | <b>Therophytes</b>      | <b>Resedaceae</b>   | <b>2</b> |
| <b><i>Reseda phyteuma</i> L.</b>                  | <b>Therophytes</b>      | <b>Resedaceae</b>   | <b>2</b> |
| <i>Rhagadiolus edulis</i> Gaertn.                 | Therophytes             | Asteraceae          | -        |
| <i>Rhagadiolus stellatus</i> (L.) Gaertn.         | Therophytes             | Asteraceae          | -        |
| <i>Romulea englerii</i> Bég.                      | Geophytes               | Iridaceae           | -        |
| <i>Rosa sempervirens</i> L.                       | Phanerophytes           | Rosaceae            | -        |
| <i>Rubia peregrina</i> L.                         | Phanerophytes           | Rubiaceae           | -        |
| <b><i>Rubus ulmifolius</i> Schott</b>             | <b>Phanerophytes</b>    | <b>Rosaceae</b>     | <b>3</b> |
| <b><i>Rumex bucephalophorus</i> L.</b>            | <b>Therophytes</b>      | <b>Polygonaceae</b> | <b>3</b> |
| <b><i>Rumex conglomeratus</i> Murray</b>          | <b>Hemicryptophytes</b> | <b>Polygonaceae</b> | <b>3</b> |
| <b><i>Rumex intermedius</i> DC.</b>               | <b>Hemicryptophytes</b> | <b>Polygonaceae</b> | <b>3</b> |
| <b><i>Rumex spinosus</i> L.</b>                   | <b>Therophytes</b>      | <b>Polygonaceae</b> | <b>3</b> |
| <i>Ruscus aculeatus</i> L.                        | Chamaephytes            | Liliaceae           | -        |
| <i>Ruscus hypophyllum</i> L.                      | Chamaephytes            | Asparagaceae        | -        |
| <i>Salvia verbenaca</i> L.                        | Hemicryptophytes        | Lamiaceae           | -        |
| <i>Sanguisorba minor</i> Scop.                    | Hemicryptophytes        | Rosaceae            | -        |
| <i>Satureja clinopodium</i> Caruel                | Chamaephytes            | Lamiaceae           | -        |
| <i>Scabiosa atropurpurea</i> L.                   | Therophytes             | Caprifoliaceae      | -        |
| <i>Scilla monophyllos</i> Link                    | Geophytes               | Asparagaceae        | -        |
| <i>Scolymus hispanicus</i> L.                     | Hemicryptophytes        | Asteraceae          | -        |
| <i>Scolymus maculatus</i> L.                      | Therophytes             | Asteraceae          | -        |
| <i>Scorpiurus muricatus</i> L.                    | Therophytes             | Fabaceae            | -        |
| <i>Scorpiurus vermiculatus</i> L.                 | Therophytes             | Fabaceae            | -        |
| <i>Scorzonera laciniata</i> L.                    | Hemicryptophytes        | Asteraceae          | -        |
| <i>Selaginella denticulata</i> (L.) Spring        | Chamaephytes            | Selaginellaceae     | -        |
| <i>Senecio gallicus</i> Chaix                     | Therophytes             | Asteraceae          | -        |
| <i>Senecio lividus</i> L.                         | Therophytes             | Asteraceae          | -        |
| <i>Serapias lingua</i> L.                         | Geophytes               | Orchidaceae         | -        |
| <i>Sherardia arvensis</i> L.                      | Therophytes             | Rubiaceae           | -        |
| <i>Silene gallica</i> L.                          | Therophytes             | Caryophyllaceae     | -        |
| <i>Silene laeta</i> (Ait.) A. Br                  | Geophytes               | Caryophyllaceae     | -        |
| <i>Silene vulgaris</i> (Moench) Garcke            | Hemicryptophytes        | Caryophyllaceae     | -        |
| <i>Silybum marianum</i> (L.) Gaertn.              | Hemicryptophytes        | Asteraceae          | -        |
| <i>Sinapis arvensis</i> L.                        | Therophytes             | Brassicaceae        | -        |
| <i>Sisymbrium officinale</i> (L.) Scop.           | Therophytes             | Brassicaceae        | -        |
| <i>Smilax aspera</i> L.                           | Phanerophytes           | Smilacaceae         | -        |
| <i>Solanum alatum</i> Moench                      | Therophytes             | Solanaceae          | -        |
| <i>Solanum nigrum</i> L.                          | Therophytes             | Solanaceae          | -        |
| <i>Solanum linnaeanum</i> Hepper & P.-M.L. Jaeger | Phanerophytes           | Solanaceae          | -        |
| <i>Sonchus asper</i> (L.) Hill                    | Therophytes             | Asteraceae          | -        |
| <i>Sonchus oleraceus</i> L.                       | Therophytes             | Asteraceae          | -        |
| <i>Spergula arvensis</i> L.                       | Therophytes             | Caryophyllaceae     | -        |
| <i>Spergula arvensis</i> L.                       | Therophytes             | Caryophyllaceae     | -        |
| <i>Spergularia media</i> (L.) C.Presl             | Hemicryptophytes        | Caryophyllaceae     | -        |
| <i>Spergularia purpurea</i> (Pers.) G. Don        | Therophytes             | Caryophyllaceae     | -        |
| <i>Stachys arvensis</i> L.                        | Therophytes             | Lamiaceae           | -        |
| <i>Stachys ocymastrum</i> (L.) Briq.              | Therophytes             | Lamiaceae           | -        |

|                                                                    |                         |                  |          |
|--------------------------------------------------------------------|-------------------------|------------------|----------|
| <i>Stellaria media</i> (L.) Vill.                                  | Hemicryptophytes        | Caryophyllaceae  | -        |
| <b><i>Stipellula capensis</i> (Thunb.) Röser &amp; H.R.Hamasha</b> | <b>Hemicryptophytes</b> | <b>Poaceae</b>   | <b>4</b> |
| <i>Tamus communis</i> L.                                           | Hemicryptophytes        | Dioscoreaceae    | -        |
| <i>Teucrium betonicum</i> L.                                       | Hemicryptophytes        | Lamiaceae        | -        |
| <i>Teucrium fruticans</i> L.                                       | Phanerophytes           | Lamiaceae        | -        |
| <i>Teucrium polium</i> L.                                          | Chamaephytes            | Lamiaceae        | -        |
| <i>Thapsia garganica</i> L.                                        | Hemicryptophytes        | Apiaceae         | -        |
| <i>Theligonum cynocrambe</i> L.                                    | Therophytes             | Rubiaceae        | -        |
| <i>Thymelaea hirsuta</i> (L.) Endl.                                | Phanerophytes           | Thymelaeaceae    | -        |
| <i>Thymelaea lythroides</i> Barratte & Murb.                       | Phanerophytes           | Thymelaeaceae    | -        |
| <i>Tolpis barbata</i> (L.) Gaertn.                                 | Therophytes             | Asteraceae       | -        |
| <i>Tolpis nemoralis</i> Font Quer                                  | Therophytes             | Asteraceae       | -        |
| <i>Torilis arvensis</i> (Huds.) Link                               | Therophytes             | Apiaceae         | -        |
| <i>Torilis nodosa</i> (L.) Gaertn.                                 | Therophytes             | Apiaceae         | -        |
| <i>Trifolium angustifolium</i> L.                                  | Therophytes             | Fabaceae         | -        |
| <i>Trifolium arvense</i> L.                                        | Therophytes             | Fabaceae         | -        |
| <i>Trifolium campestre</i> Schreber                                | Therophytes             | Fabaceae         | -        |
| <i>Trifolium isthmocarpum</i> Brot.                                | Therophytes             | Fabaceae         | -        |
| <i>Trifolium scabrum</i> L.                                        | Therophytes             | Fabaceae         | -        |
| <i>Trifolium stellatum</i> L.                                      | Therophytes             | Fabaceae         | -        |
| <i>Trifolium subterraneum</i> L.                                   | Therophytes             | Fabaceae         | -        |
| <i>Trifolium tomentosum</i> L.                                     | Therophytes             | Fabaceae         | -        |
| <i>Triguera osbeckii</i> (L.) Willk.                               | Therophytes             | Solanaceae       | -        |
| <i>Tripodion tetraphyllum</i> (L.) Fourr.                          | Therophytes             | Fabaceae         | -        |
| <b><i>Tuberaria guttata</i> (L.) Fourreau</b>                      | <b>Therophytes</b>      | <b>Cistaceae</b> | <b>2</b> |
| <i>Tuberaria lignosa</i> (Sweet) Samp.                             | Hemicryptophytes        | Cistaceae        | -        |
| <i>Tuberaria macrosepala</i> (Coss.) Willk.                        | Therophytes             | Cistaceae        | -        |
| <i>Umbilicus horizontalis</i> (Guss.) DC.                          | Geophytes               | Crassulaceae     | -        |
| <i>Umbilicus rupestris</i> (Salisb.) Dandy                         | Geophytes               | Crassulaceae     | -        |
| <i>Urospermum dalechampii</i> (L.) Scop.                           | Hemicryptophytes        | Asteraceae       | -        |
| <i>Urospermum picroides</i> (L.) Scop                              | Therophytes             | Asteraceae       | -        |
| <i>Urtica urens</i> L.                                             | Therophytes             | Urticaceae       | -        |
| <i>Verbascum sinuatum</i> L.                                       | Hemicryptophytes        | Scrophulariaceae | -        |
| <i>Veronica agrestis</i> L.                                        | Therophytes             | Scrophulariaceae | -        |
| <i>Veronica cymbalaria</i> Bodard                                  | Therophytes             | Plantaginaceae   | -        |
| <i>Veronica persica</i> Poir.                                      | Therophytes             | Scrophulariaceae | -        |
| <i>Veronica polita</i> Fr.                                         | Therophytes             | Plantaginaceae   | -        |
| <i>Veronica rosea</i> Desf.                                        | Therophytes             | Plantaginaceae   | -        |
| <i>Veronica serpyllifolia</i> L.                                   | Hemicryptophytes        | Scrophulariaceae | -        |
| <i>Viburnum tinus</i> L.                                           | Phanerophytes           | Adoxaceae        | -        |
| <b><i>Vicia faba</i> L.</b>                                        | <b>Therophytes</b>      | <b>Fabaceae</b>  | <b>4</b> |
| <b><i>Vicia hirsuta</i> (L.) Gray</b>                              | <b>Therophytes</b>      | <b>Fabaceae</b>  | <b>4</b> |
| <b><i>Vicia lathyroides</i> L.</b>                                 | <b>Therophytes</b>      | <b>Fabaceae</b>  | <b>4</b> |
| <b><i>Vicia lutea</i> L.</b>                                       | <b>Therophytes</b>      | <b>Fabaceae</b>  | <b>4</b> |
| <b><i>Vicia peregrina</i> L.</b>                                   | <b>Therophytes</b>      | <b>Fabaceae</b>  | <b>4</b> |
| <b><i>Vicia sativa</i> L.</b>                                      | <b>Therophytes</b>      | <b>Fabaceae</b>  | <b>4</b> |
| <i>Vinca difformis</i> Pourr.                                      | Chamaephytes            | Apocynaceae      | -        |
| <i>Vulpia alopecuroides</i> (Schousb.) Dumort.                     | Therophytes             | Poaceae          | -        |
| <i>Vulpia geniculata</i> (L.) Link.                                | Therophytes             | Poaceae          | -        |
| <i>Vulpia myuros</i> (L.) C.C.Gmel.                                | Therophytes             | Poaceae          | -        |
| <i>Ziziphus lotus</i> (L.) Lam.                                    | Phanerophytes           | Rhamnaceae       | -        |

In bold, the studied plant species (n = 95) in terms of palatability degree. The palatability index: (0) complete avoidance and completely non-palatable species, (1) occasionally palatable or poorly palatable, (2) moderate preference and medium palatable, (3) palatable, (4) very palatable, and (5) complete preference and highly palatable.
